# Supplementary material for: Safety and immunogenicity of rabies vaccine (PVRV-WIBP) in healthy Chinese aged 10–50 years old: Randomized, blinded, parallel controlled phase III clinical study
Source: PubMed Central journal article supplement — Hum Vaccin Immunother. 2023 May 30;19(1):2211896. doi: 10.1080/21645515.2023.2211896 (PMC10294720; doi:10.1080/21645515.2023.2211896), 2023-05-30
Supplement: KHVI_A_2211896_SM9317.pdf [file KHVI_A_2211896_SM9317.pdf]

**Table S1 Immunogenicity analysis pre-vaccination**

| Pre-vaccination | 5-dose PVRV-WIBP  | 5-dose PVRV-LNCD  | 4-dose PVRV-WIBP  | <i>P</i> -value |
|-----------------|-------------------|-------------------|-------------------|-----------------|
| All subjects    | 0.10 ( 0.09-0.10) | 0.10 ( 0.09-0.10) | 0.10 ( 0.09-0.10) | 0.9325          |
| 0:7:42/35       | 0.09 ( 0.09-0.10) | 0.09 ( 0.09-0.10) | 0.10 ( 0.09-0.11) | 0.0270          |
| 0:14:42/35      | 0.10 ( 0.09-0.11) | 0.10 ( 0.09-0.10) | 0.09 ( 0.09-0.09) | 0.0387          |

**Table S2 Antibody levels were compared between groups**

| Blood schedule          | Antibody titer, GMT (95%) |                  |                  | <i>P</i> - value                     |                                      |
|-------------------------|---------------------------|------------------|------------------|--------------------------------------|--------------------------------------|
|                         | 5-dose PVRV-WIBP          | 5-dose PVRV-LNCD | 4-dose PVRV-WIBP | 5-dose PVRV-WIBP vs 5-dose PVRV-LNCD | 5-dose PVRV-WIBP vs 4-dose PVRV-WIBP |
| 0:7:42/35               | 1.05                      | 0.70             | 1.50             | 0.0001                               | 0.0008                               |
| 0:14:42/35              | 35.36                     | 29.32            | 36.55            | 0.0011                               | 0.5452                               |
| 14-day PWV <sup>a</sup> | 19.97                     | 15.28            | 21.55            | <0.0001                              | 0.0895                               |

a. 14-day PWV, 14 days after the whole vaccine schedule.
